# Supplementary material
Source: publisher site journal article supplement (https://www.dovepress.com/article/600303)
Supplement: Supplementary file 1 [file 600303%20Supplementary%20Material.doc]

**Supplementary Figure S1.** Flowchart of publications search and exclusion process.


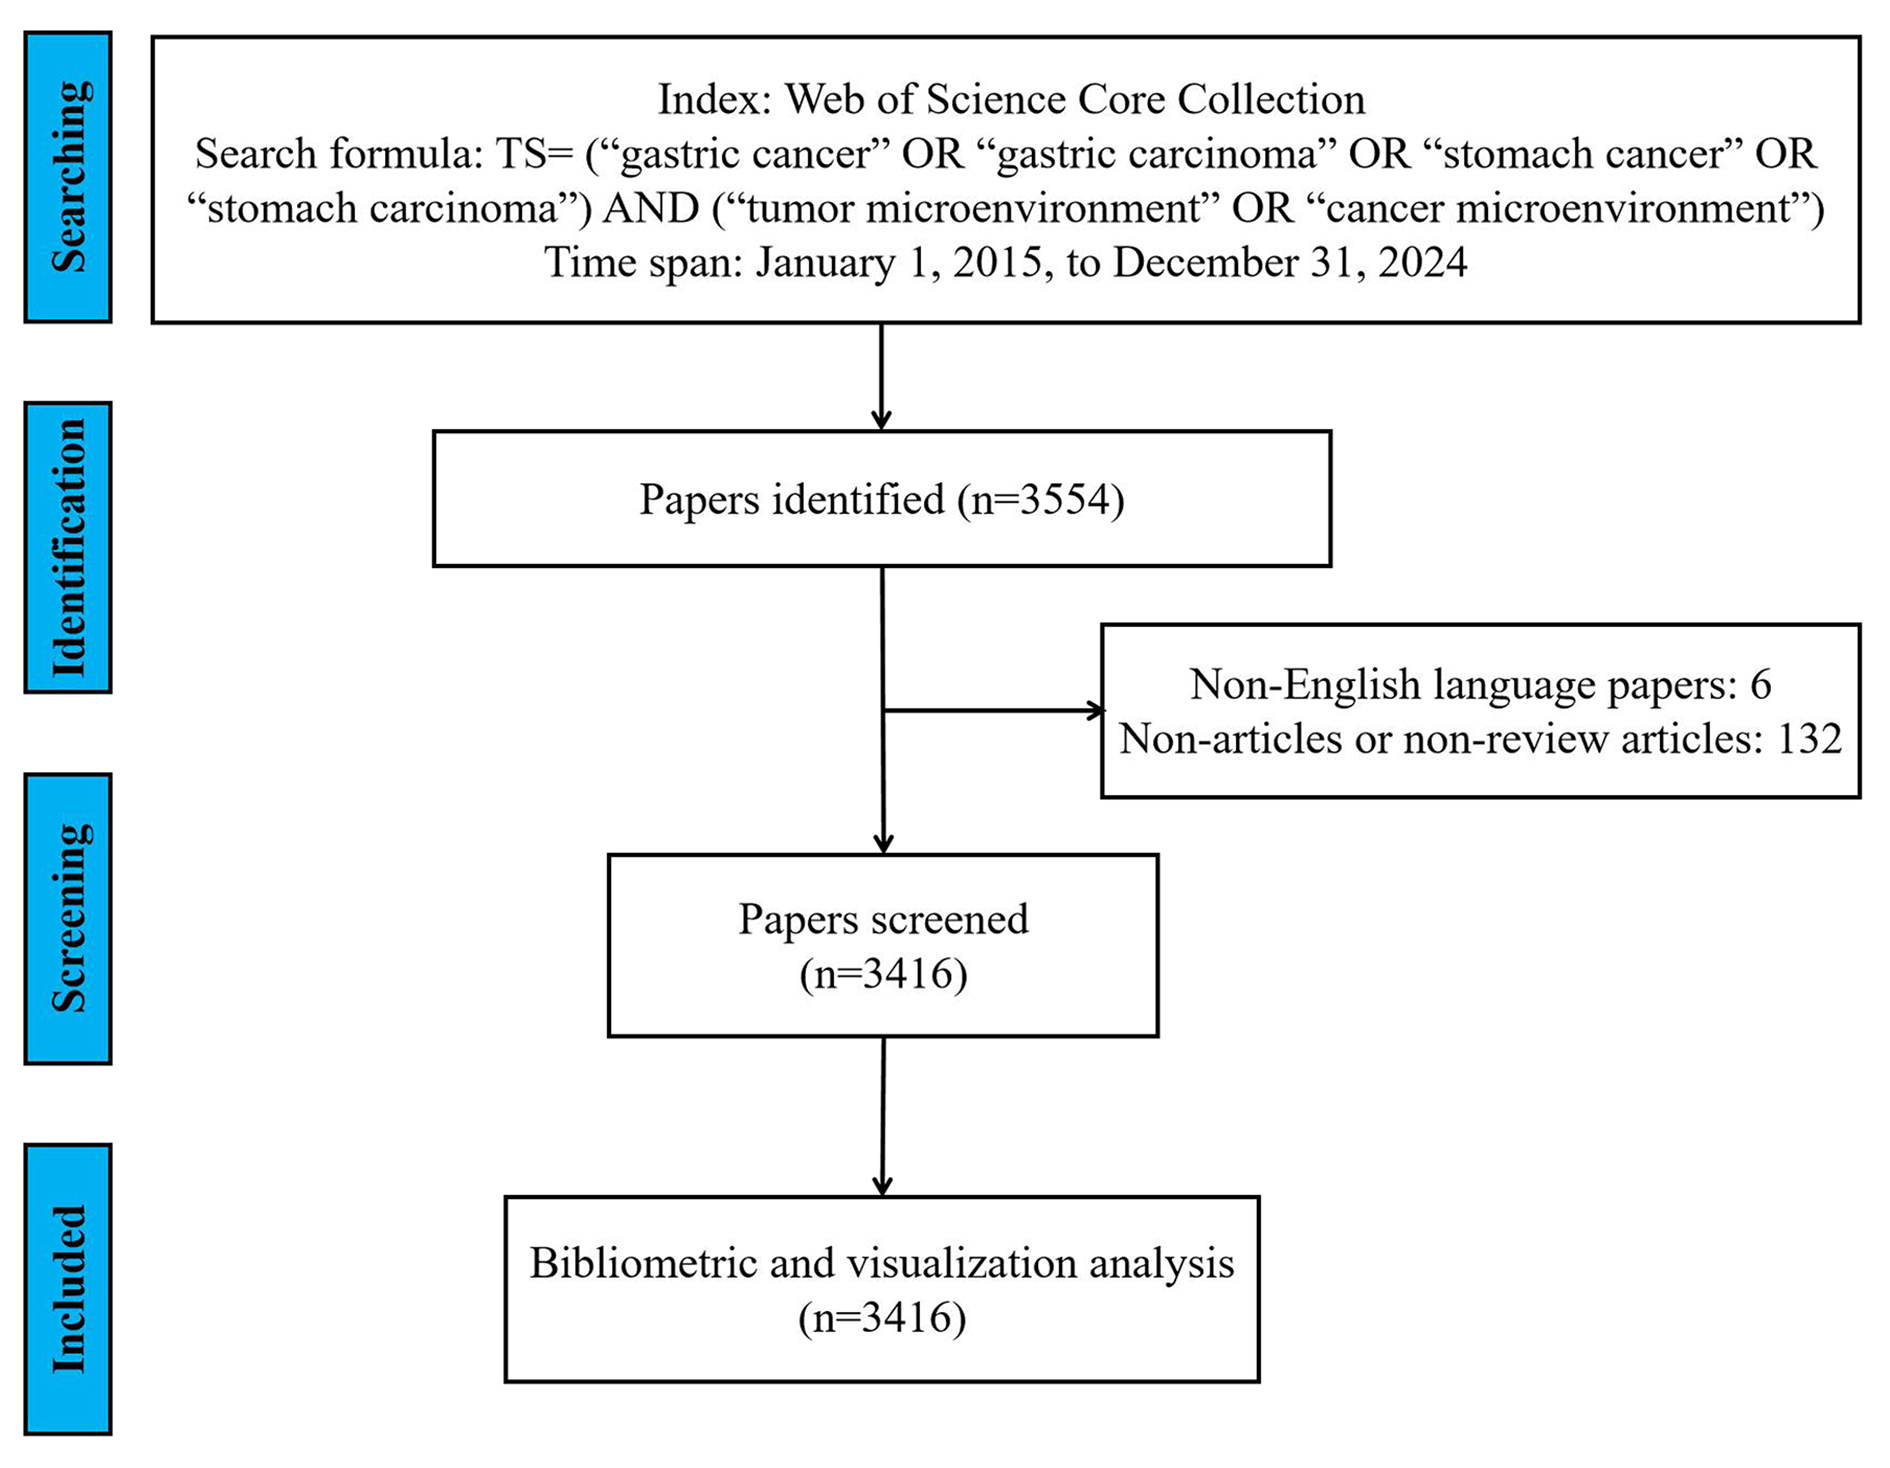


**Supplementary Figure S2 (A)** Map of collaborative network among countries/regions based on CiteSpace; **(B)** Map of collaborative network among institutions based on CiteSpace; **(C)** The distribution of publications across disciplines; **(D)** The dual-map overlay of journals based on CiteSpace.


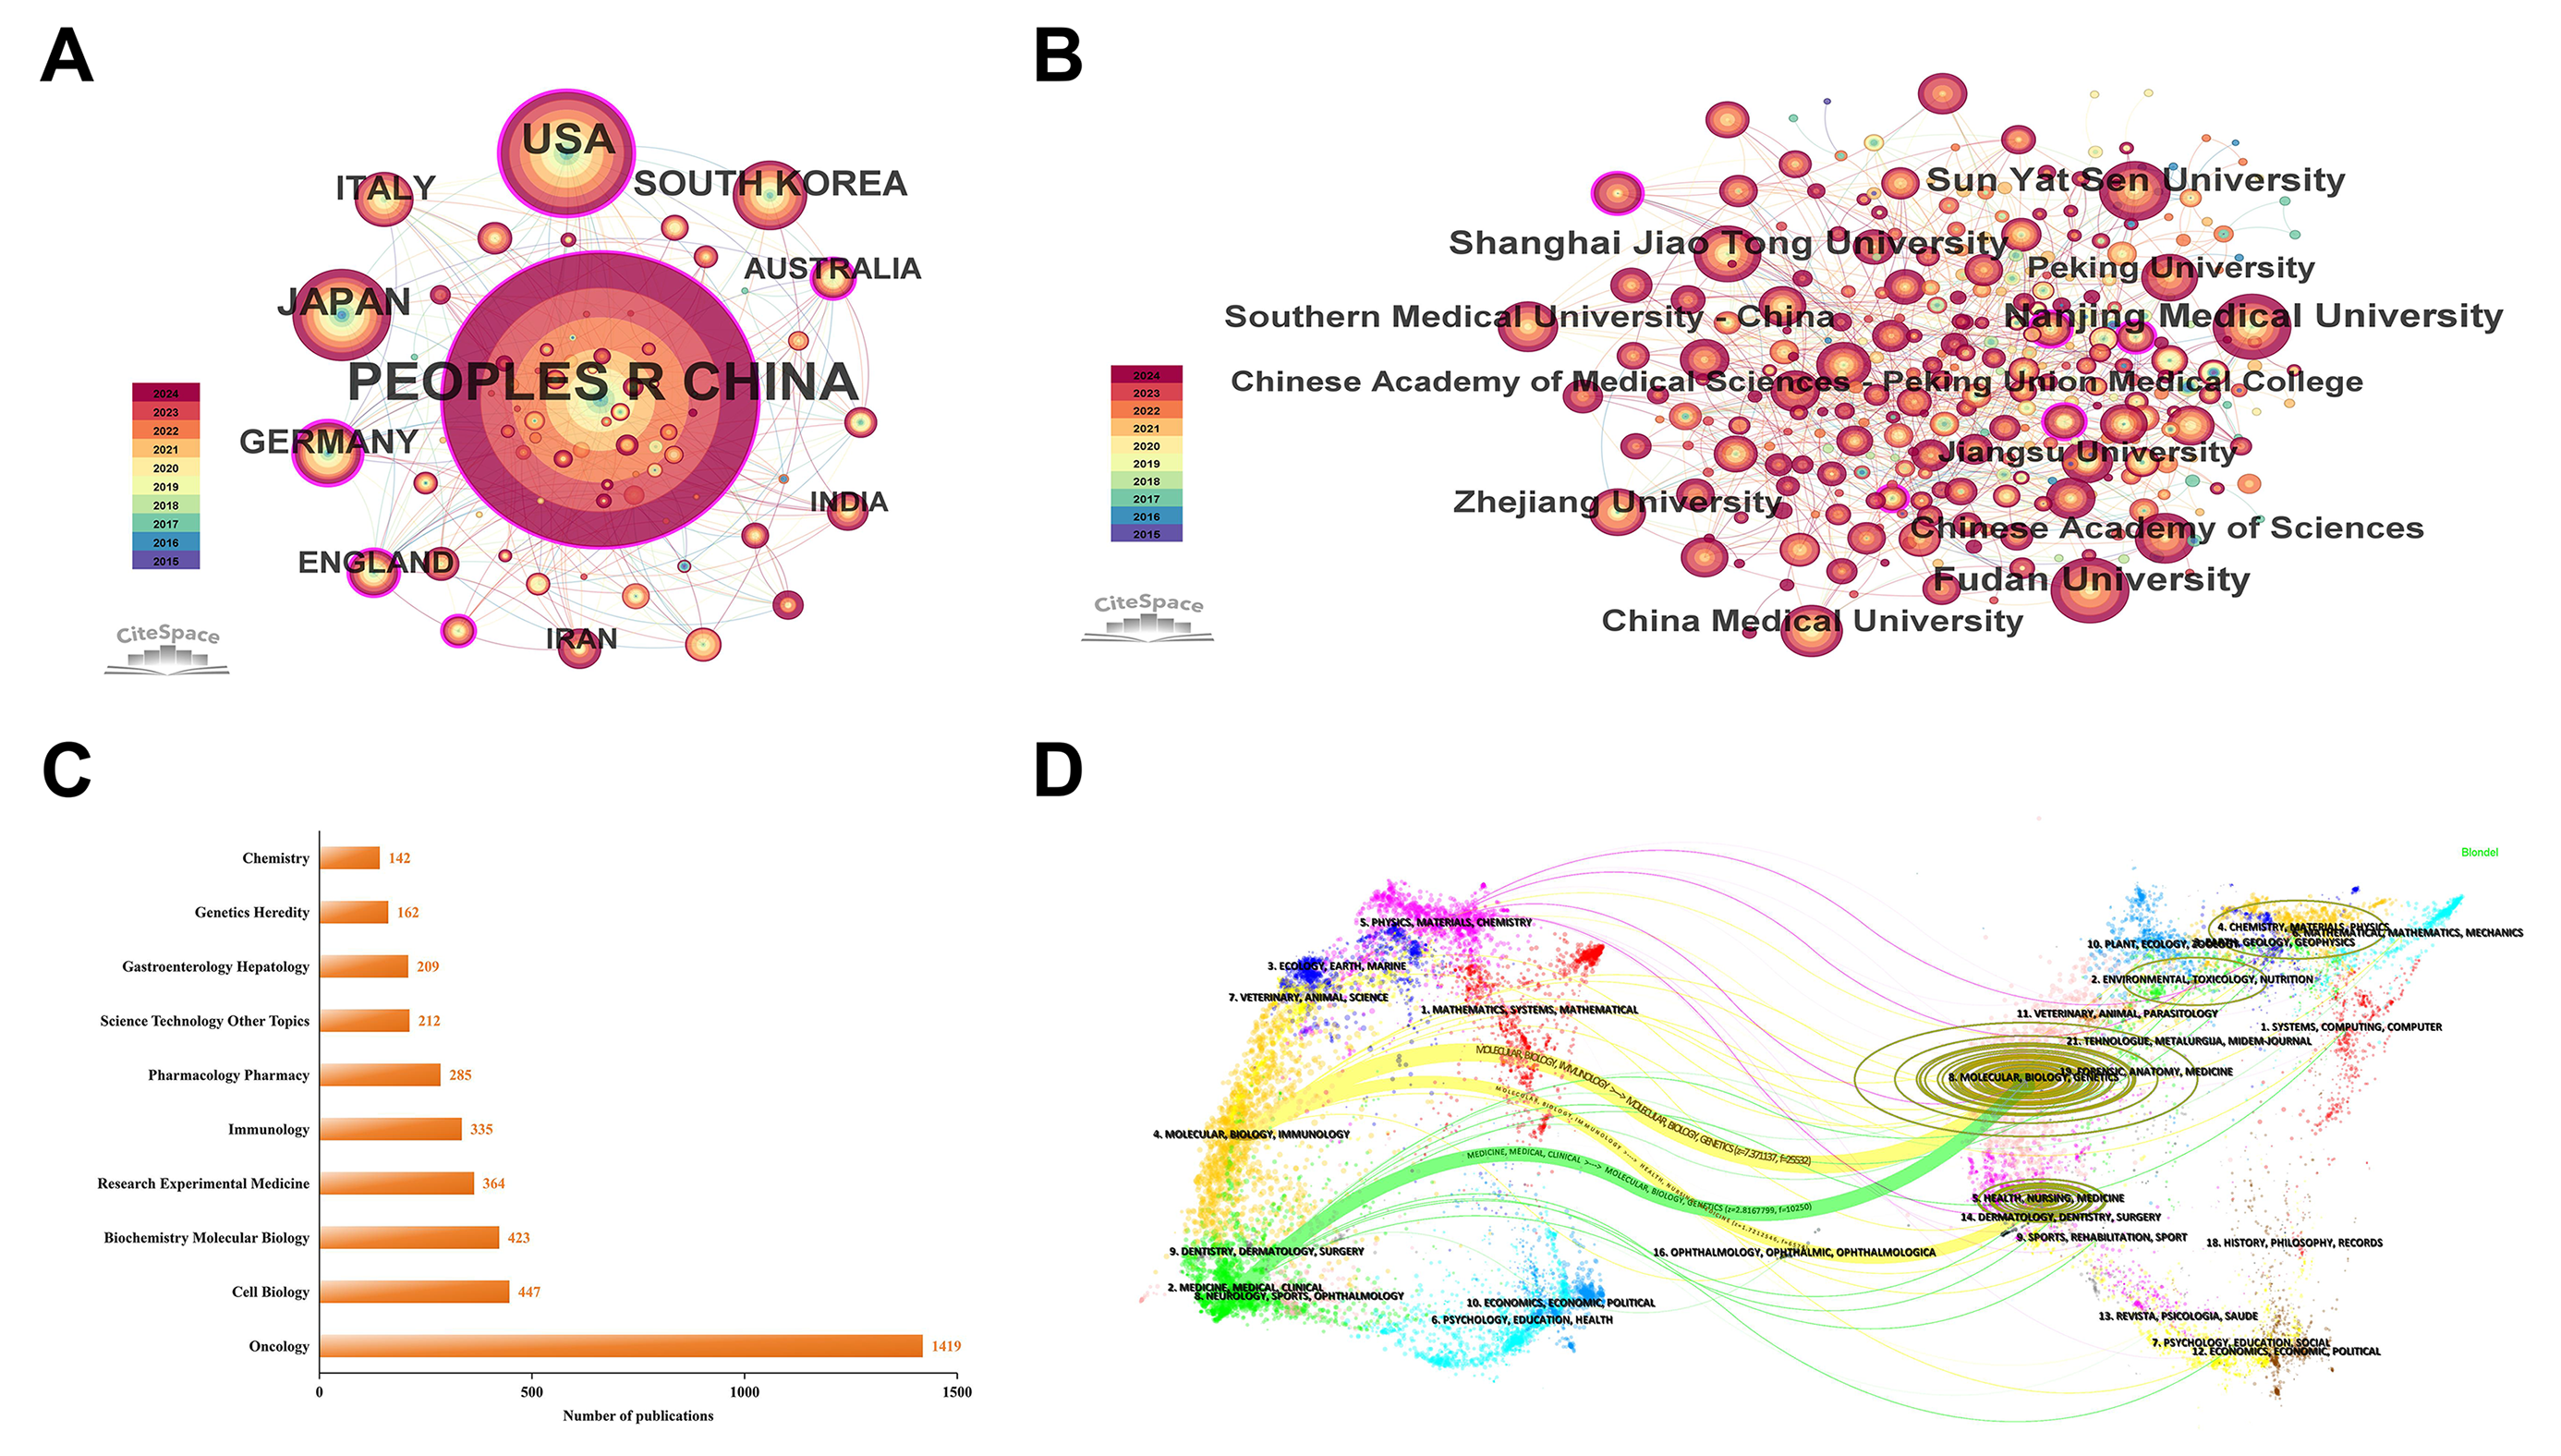


**Supplementary Figure S3 (A)** Map of collaborative network among authors based on CiteSpace; **(B)** Network diagram of the co-cited authors based on VOSviewer.


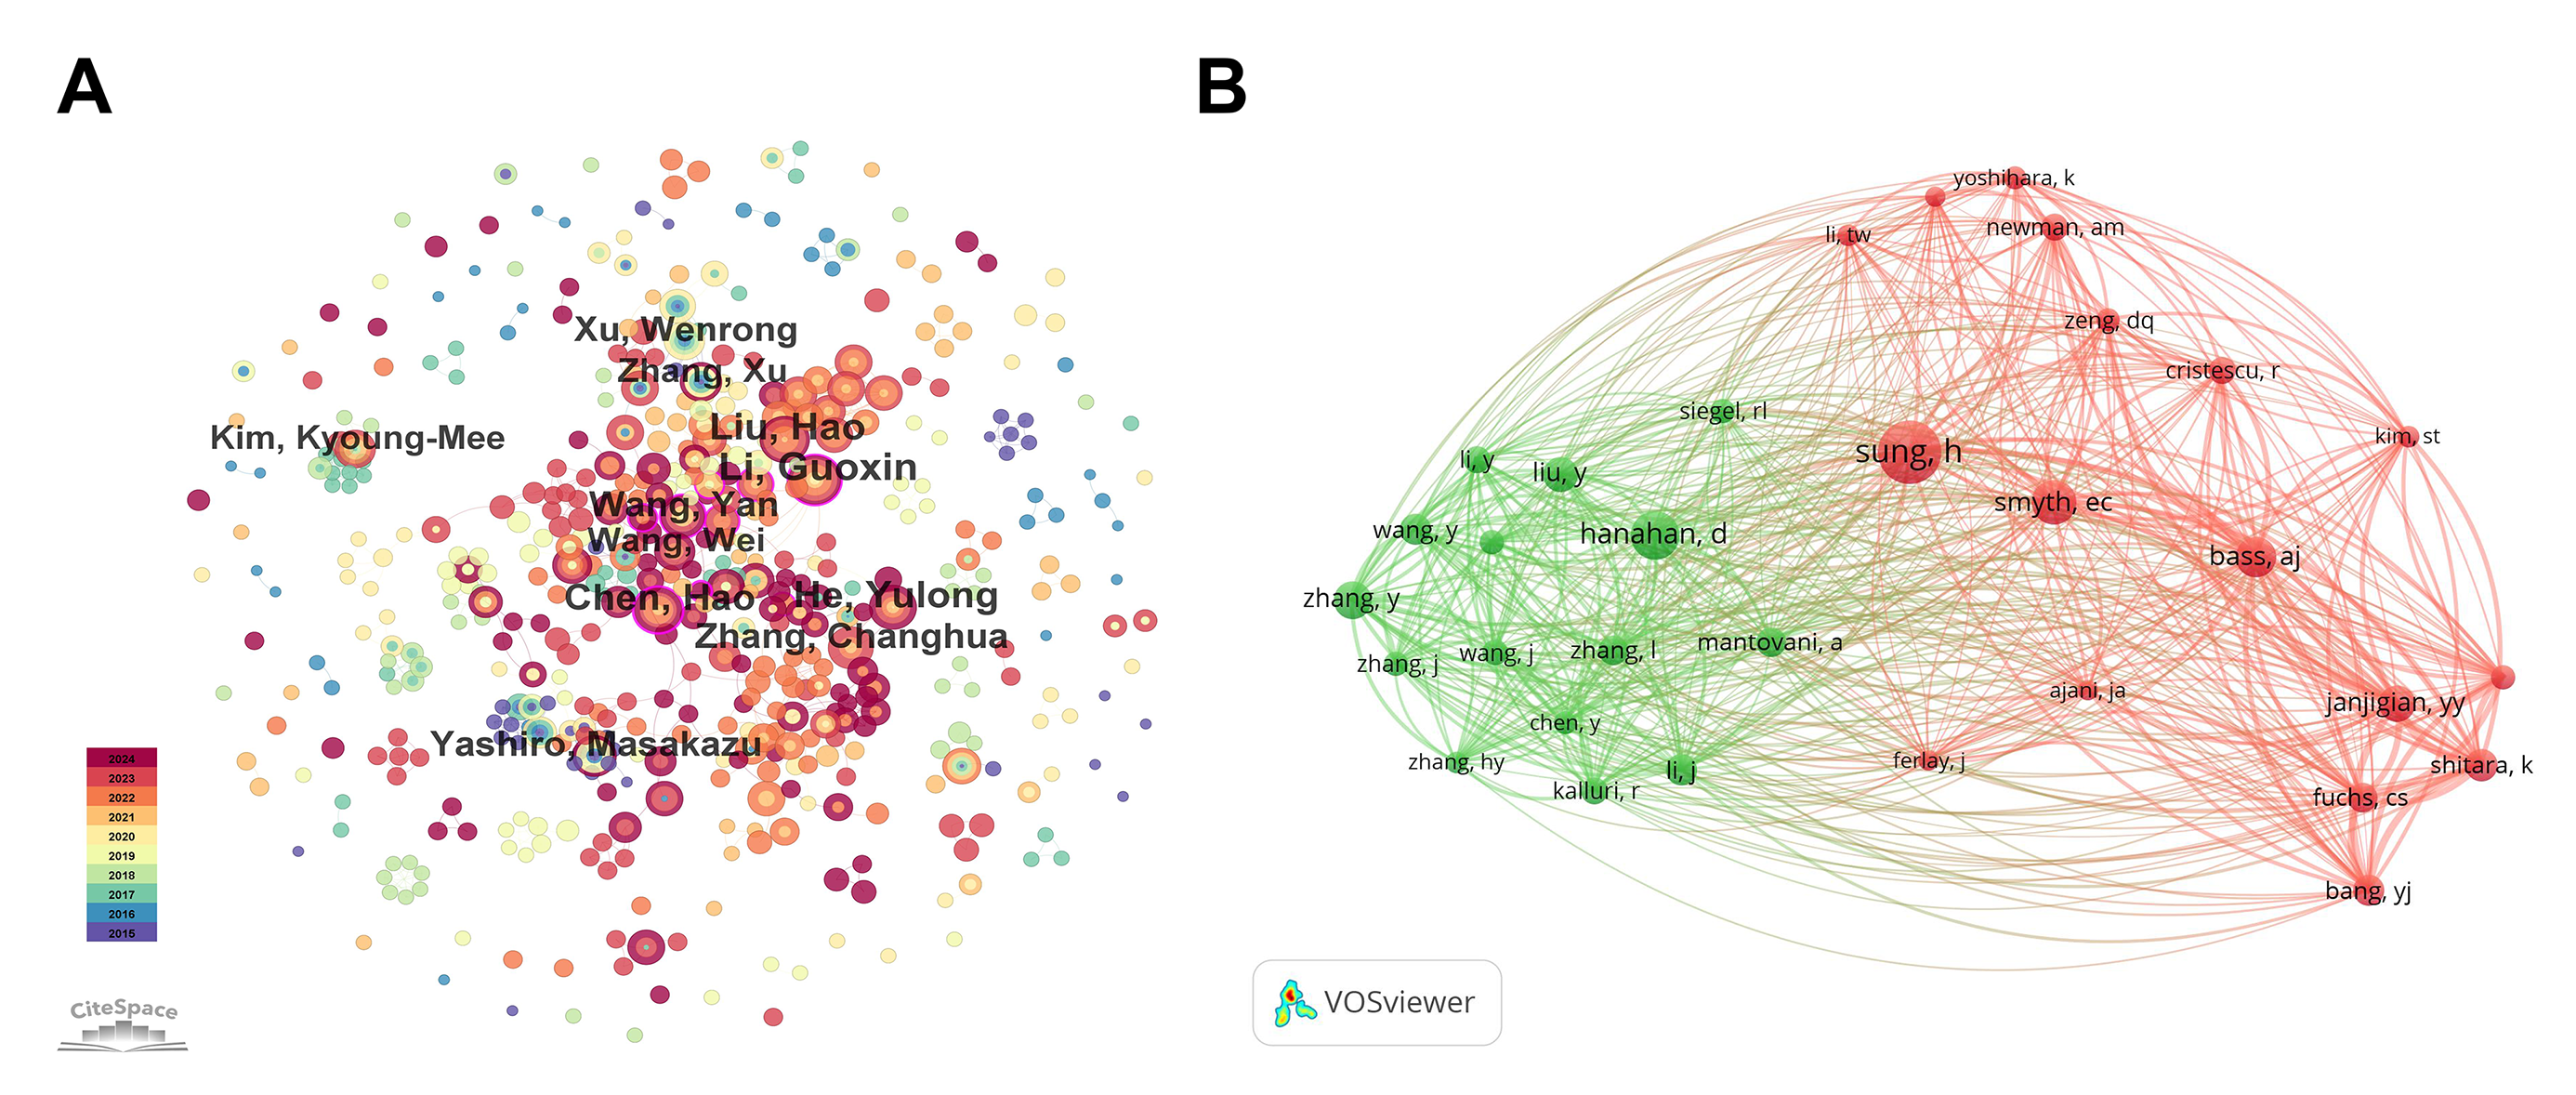


**Table S1** The top 10 countries/regions with the largest number of publications

| **Rank** | **Country** | **Count** | **Citation** | **Average Citation** | **H-Index** | **Centrality** |
| --- | --- | --- | --- | --- | --- | --- |
| 1 | PEOPLES R CHINA | 2227 | 48104 | 21.6 | 95 | 0.12 |
| 2 | USA | 427 | 19491 | 45.65 | 72 | 0.36 |
| 3 | JAPAN | 236 | 9301 | 39.41 | 50 | 0.03 |
| 4 | SOUTH KOREA | 149 | 4402 | 29.54 | 36 | 0.01 |
| 5 | GERMANY | 114 | 4848 | 42.53 | 35 | 0.31 |
| 6 | ITALY | 104 | 4204 | 40.42 | 36 | 0.08 |
| 7 | ENGLAND | 72 | 2284 | 31.72 | 24 | 0.15 |
| 8 | AUSTRALIA | 56 | 2427 | 43.34 | 26 | 0.15 |
| 9 | IRAN | 55 | 1836 | 33.38 | 20 | 0.06 |
| 10 | INDIA | 49 | 1322 | 26.98 | 20 | 0.07 |

**Table S2** The top 10 institutions with the largest number of publications

| **Rank** | **Institution** | **Country** | **Count** | **Citation** | **Average Citation** | **H-Index** | **Centrality** |
| --- | --- | --- | --- | --- | --- | --- | --- |
| 1 | Nanjing Medical University | China | 140 | 2668 | 19.06 | 30 | 0.04 |
| 2 | Fudan University | China | 133 | 2389 | 17.96 | 25 | 0.03 |
| 3 | Shanghai Jiao Tong University | China | 123 | 4672 | 37.98 | 34 | 0.09 |
| 4 | Sun Yat Sen University | China | 122 | 3447 | 28.25 | 30 | 0.13 |
| 5 | China Medical University | China | 91 | 2072 | 22.77 | 27 | 0.06 |
| 6 | Chinese Academy of Sciences | China | 91 | 1783 | 19.59 | 21 | 0.08 |
| 7 | Southern Medical University (China) | China | 87 | 3206 | 36.85 | 28 | 0.11 |
| 8 | Zhejiang University | China | 82 | 2140 | 26.1 | 24 | 0.04 |
| 9 | Peking University | China | 75 | 1735 | 23.13 | 22 | 0.05 |
| 10 | Chinese Academy of Medical Sciences - Peking Union Medical College | China | 72 | 1509 | 20.96 | 21 | 0.03 |

**Table S3** The top 10 journals with the largest number of publications

| **Rank** | **Journal** | **Count** | **Citation** | **Average Citation** | **H-index** | **IF** | **JCI** | **JCR** |
| --- | --- | --- | --- | --- | --- | --- | --- | --- |
| 1 | Frontiers in Oncology | 164 | 3257 | 19.86 | 31 | 3.5 | 0.75 | Q2 |
| 2 | Frontiers in Immunology | 139 | 3722 | 26.78 | 31 | 5.7 | 0.95 | Q1 |
| 3 | Cancers | 112 | 2888 | 25.79 | 27 | 4.5 | 0.91 | Q1 |
| 4 | Scientific Reports | 73 | 1421 | 19.47 | 20 | 3.8 | 1.05 | Q1 |
| 5 | International Journal of Molecular Sciences | 72 | 2510 | 34.86 | 27 | 4.9 | 0.71 | Q1 |
| 6 | Frontiers in Genetics | 52 | 527 | 10.13 | 12 | 2.8 | 0.80 | Q2 |
| 7 | Frontiers in Cell and Developmental Biology | 50 | 910 | 18.20 | 16 | 4.6 | 0.85 | Q1 |
| 8 | Gastric Cancer | 43 | 1410 | 32.79 | 19 | 5.9 | 1.49 | Q1 |
| 9 | Cancer Cell International | 37 | 597 | 16.14 | 15 | 5.3 | 1.12 | Q1 |
| 10 | Journal of Translational Medicine | 36 | 497 | 13.81 | 12 | 6.1 | 1.52 | Q1 |

**Abbreviations:** IF, Impact Factor (2023); JCI, Journal Citation Indicator (2023); JCR, Journal Citation Reports.

**Table S4 The top 10 references with the most co-citations related to the tumor microenvironment of gastric cancer**

| **Rank** | **Co-cited Reference** | **Cited Times** | **Total link strength** | **Country** |
| --- | --- | --- | --- | --- |
| 1 | Sung H, 2021, ca-cancer j clin, v71, p209,  doi 10.3322/caac.21660 | 631 | 1488 | USA |
| 2 | Bass AJ, 2014, nature, v513, p202,  doi 10.1038/nature13480 | 410 | 1449 | USA |
| 3 | Bray F, 2020, ca cancer j clin, v70, p313,  doi 10.3322/caac.21492 | 391 | 874 | France |
| 4 | Smyth EC, 2020, lancet, v396, p635,  doi 10.1016/s0140-6736(20)31288-5 | 348 | 1090 | UK |
| 5 | Hanahan D, 2011, cell, v144, p646,  doi 10.1016/j.cell.2011.02.013 | 302 | 479 | Switzerland |
| 6 | Cristescu R, 2015, nat med, v21, p449,  doi 10.1038/nm.3850 | 240 | 1120 | USA |
| 7 | Yoshihara K, 2013, nat commun, v4,  doi 10.1038/ncomms3612 | 229 | 1066 | USA |
| 8 | Newman AM, 2015, nat methods, v12, p453,  doi 10.1038/nmeth.3337 | 222 | 946 | USA |
| 9 | Kim ST, 2018, nat med, v24, p1449,  doi 10.1038/s41591-018-0101-z | 197 | 1018 | South Korea |
| 10 | Hänzelmann s, 2013, bmc bioinformatics, v14,  doi 10.1186/1471-2105-14-7 | 195 | 981 | Spain |

**Table S5** The top 10 keywords with the most occurrences related to the tumor microenvironment of gastric cancer

| **Rank** | **Keywords** | **Occurrences** | **Total link strength** |
| --- | --- | --- | --- |
| 1 | gastric cancer | 631 | 1488 |
| 2 | tumor microenvironment | 410 | 1449 |
| 3 | prognosis | 391 | 874 |
| 4 | immunotherapy | 348 | 1090 |
| 5 | cancer | 302 | 479 |
| 6 | biomarker | 240 | 1120 |
| 7 | metastasis | 229 | 1066 |
| 8 | immune infiltration | 222 | 946 |
| 9 | immune microenvironment | 197 | 1018 |
| 10 | angiogenesis | 195 | 981 |
